# Supplementary material for: The Effect of Achieving Serologic Remission on Subsequent Risk of Relapse, End-Stage Renal Disease, and Mortality in ANCA-Associated Vasculitis: A Target Trial Emulation Study
Source: PubMed Central journal article supplement (PMC9474699; doi:10.1136/annrheumdis-2022-222439), 2022-06-13
Supplement: NIHMS1812273-supplement-Supp1.pdf [file NIHMS1812273-supplement-Supp1.pdf]

**SUPPLEMENTARY MATERIAL FOR: “The Effect of Achieving Serologic Remission on Subsequent Risk of Relapse, End-Stage Renal Disease, and Mortality in ANCA-Associated Vasculitis: A Target Trial Emulation Study” by McDermott, et al**

**Supplemental Table 1: Mean ANCA titer measurements in AAV patients with and without major organ involvement at baseline**

|                                                           | <b>Major Organ Involvement at Baseline (n=395)</b> | <b>No Major Organ Involvement at Baseline (n=111)</b> |
|-----------------------------------------------------------|----------------------------------------------------|-------------------------------------------------------|
| ANCA measurements during follow up* (mean, SD)            | 13.1 (8.4)                                         | 14.7 (10.4)                                           |
| ANCA measurements within 180 days of induction (mean, SD) | 3.6 (2.0)                                          | 3.5 (1.7)                                             |

\* within five years of induction or from induction to relapse or last MGB follow up if <5 years

**Supplemental Table 2: Frequency of ANCA titer testing among AAV patients (n=506)**

| <b>Number of ANCA titer measurements</b> | <b>During follow up* (n, %)</b> | <b>Within 180 days of induction (n, %)</b> |
|------------------------------------------|---------------------------------|--------------------------------------------|
| 1                                        | 9 (1.8%)                        | 79 (15.6%)                                 |
| 2                                        | 22 (4.4%)                       | 94 (18.6%)                                 |
| 3                                        | 20 (4%)                         | 106 (21%)                                  |
| 4                                        | 35 (6.9%)                       | 87 (17.2%)                                 |
| 5                                        | 23 (4.6%)                       | 59 (11.7%)                                 |
| 6                                        | 28 (5.5%)                       | 38 (7.5%)                                  |
| 7                                        | 24 (4.7%)                       | 23 (4.6%)                                  |
| 8                                        | 28 (5.5%)                       | 14 (2.8%)                                  |
| 9                                        | 21 (4.2%)                       | 4 (0.8%)                                   |
| 10                                       | 14 (2.8%)                       | 1 (0.2%)                                   |
| 11                                       | 22 (4.4%)                       | 1 (0.2%)                                   |
| 12                                       | 18 (3.6%)                       |                                            |
| 13                                       | 11 (2.2%)                       |                                            |
| 14                                       | 22 (4.4%)                       |                                            |
| 15                                       | 18 (3.6%)                       |                                            |
| 16                                       | 19 (3.8%)                       |                                            |
| 17                                       | 16 (3.2%)                       |                                            |
| 18                                       | 18 (3.6%)                       |                                            |
| 19                                       | 12 (2.4%)                       |                                            |
| 20                                       | 16 (3.2%)                       |                                            |
| 21                                       | 10 (2%)                         |                                            |
| 22                                       | 16 (3.2%)                       |                                            |
| 23                                       | 8 (1.6%)                        |                                            |
| 24                                       | 12 (2.4%)                       |                                            |
| 25                                       | 14 (2.8%)                       |                                            |
| 26                                       | 9 (1.8%)                        |                                            |
| 27                                       | 7 (1.4%)                        |                                            |
| 28                                       | 6 (1.2%)                        |                                            |
| 29                                       | 5 (1%)                          |                                            |

|    |          |  |
|----|----------|--|
| 30 | 3 (0.6%) |  |
| 31 | 5 (1%)   |  |
| 32 | 4 (0.8%) |  |
| 33 | 3 (0.6%) |  |
| 34 | 3 (0.6%) |  |
| 35 | 1 (0.2%) |  |
| 38 | 1 (0.2%) |  |
| 41 | 1 (0.2%) |  |
| 42 | 1 (0.2%) |  |
| 68 | 1 (0.2%) |  |

\* within five years of induction or from induction to relapse or last MGB follow up if <5 years
